# Supplementary material for: Morphological Changes of The Root Apex In Anterior Teeth With Periapical Periodontitis: An In-Vivo Study
Source: Research Square preprint supplement (doi:10.21203/rs.3.rs-958422/v1), 2021-10-12
Supplement: Supplementary file 1 [file 34683e6968937ba213af72ee.xlsx]

## Sheet: Sheet1
ID	Sex	Year	Diameter (periapical lesion) (mm)			Diameter (healthy teeth) (mm)			Distance of AC-AF (mm)		Distance of AC-AA (mm)		Constriction forms
			BL	MD	BL-MD	BL	MD	BL-MD	Periapical lesion	Healthy teeth	Periapical lesion	Healthy teeth	Periapical lesion	Healthy teeth
1	Female	51	0.277	0.321	-0.044	0.264	0.25	0.014	0.458	0.521	0.98	1.44	flaring	parallel
2	Female	46	0.275	0.219	0.056	0.275	0.219	0.056	0.285	0.516	0.91	1.51	flaring	parallel
3	Female	23	0.564	0.37	0.194	0.381	0.301	0.08	0.276	0.796	1	1.72	parallel	parallel
4	Female	23	0.232	0.244	-0.012	0.221	0.147	0.074	0.276	0.568	1.26	2.85	traditional	parallel
5	Male	36	0.344	0.289	0.055	0.248	0.235	0.013	0.713	0.998	1.41	1.72	flaring	traditional
6	Male	42	0.274	0.207	0.067	0.23	0.181	0.049	0.542	0.845	1.1	1.83	parallel	parallel
7	Male	30	0.708	0.22	0.488	0.404	0.262	0.142	0.381	0.701	1.06	1.65	flaring	parallel
8	Female	24	0.337	0.323	0.014	0.332	0.308	0.024	0.464	0.823	1.26	1.57	traditional	traditional
9	Female	32	0.353	0.226	0.127	0.234	0.214	0.02	0.288	0.537	0.64	1.06	parallel	parallel
10	Male	32	0.301	0.255	0.046	0.219	0.193	0.026	0.383	0.632	0.85	1.35	parallel	traditional
11	Female	49	0.209	0.172	0.037	0.194	0.174	0.02	0.325	0.426	0.96	1.96	parallel	traditional
12	Male	20	0.229	0.18	0.049	0.218	0.221	-0.003	0.266	0.696	0.8	1.01	flaring	traditional
13	Female	48	0.331	0.199	0.132	0.3	0.259	0.041	0.413	0.761	0.73	1.24	parallel	parallel
14	Female	51	0.337	0.311	0.026	0.336	0.261	0.075	0.264	0.755	0.75	1.38	flaring	parallel
15	Male	29	0.366	0.325	0.041	0.26	0.26	0	0.361	0.525	0.92	1.1	flaring	parallel
16	Male	21	0.44	0.278	0.162	0.631	0.552	0.079	0.355	0.483	0.76	1.2	flaring	parallel
17	Male	28	0.361	0.263	0.098	0.326	0.225	0.101	0.39	1.02	1.59	2.24	flaring	parallel
18	Female	33	0.263	0.239	0.024	0.214	0.213	0.001	0.311	0.62	0.94	1.36	flaring	parallel
19	Female	34	0.262	0.203	0.059	0.232	0.166	0.066	0.242	0.517	0.84	1.46	flaring	parallel
20	Female	20	0.32	0.3	0.02	0.247	0.236	0.011	0.483	0.768	0.72	1.13	flaring	parallel
21	Male	51	0.328	0.239	0.089	0.264	0.248	0.016	0.583	0.695	0.72	1.04	flaring	parallel
22	Female	44	0.255	0.352	-0.097	0.31	0.342	-0.032	0.29	0.413	0.8	1.35	flaring	traditional
23	Male	41	0.219	0.197	0.022	0.247	0.23	0.017	0.599	0.789	1.56	1.94	flaring	parallel
24	Male	50	0.417	0.374	0.043	0.311	0.269	0.042	0.232	0.647	0.86	3.01	parallel	traditional
25	Female	35	0.237	0.229	0.008	0.215	0.204	0.011	0.391	0.646	0.89	1.45	parallel	parallel
26	Female	45	0.337	0.316	0.021	0.322	0.232	0.09	0.409	0.536	0.91	1.32	flaring	parallel
27	Female	45	0.246	0.218	0.028	0.23	0.228	0.002	0.402	0.526	0.82	1.4	flaring	traditional
28	Female	33	0.268	0.21	0.058	0.192	0.178	0.014	0.509	0.872	0.88	1.2	parallel	parallel
29	Female	51	0.254	0.215	0.039	0.246	0.216	0.03	0.4	0.772	0.98	1.75	flaring	parallel
30	Male	29	0.294	0.278	0.016	0.267	0.258	0.009	0.409	1.02	0.68	1.47	flaring	parallel
31	Male	62	0.318	0.25	0.068	0.298	0.283	0.015	0.6	1.03	1.19	2.01	flaring	parallel
32	Male	57	0.333	0.259	0.074	0.254	0.251	0.003	0.289	0.817	1.37	2.16	flaring	parallel
